# Supplementary material for: Comparison of High Hydrostatic Pressure Processed Plus Sous-Vide Cooked Meat-Based, Plant-Based and Hybrid Patties According to Fat Replacement
Source: MDPI journal article supplement (doi:10.3390/foods11223678), 2022-11-17
Supplement: s1 [file s1]

## Supplementary Materials

**Table S1.** Physical parameters of emulsions used in the manufacture of patties. Values are expressed as mean (standard deviation).

| Parameter  | Hydrogelled emulsion | Soya emulsion |
|------------|----------------------|---------------|
| pH         | 6.61 (0.08)          | 7.11 (0.05)   |
| <i>L</i> * | 73.34 (2.95)         | 83.56 (0.09)  |
| <i>a</i> * | 11.94 (3.26)         | 1.13 (0.44)   |
| <i>b</i> * | 79.10 (3.26)         | 25.93 (0.07)  |

**Table S2.** Description of attributes used in the sensory evaluation of samples treated by HPP or HPP+SVCOOK (continuous scale with anchor words; from 0 “very low intensity” to 15 “very high intensity”).

| Attribute           | Description                                                                                                                                                                           |
|---------------------|---------------------------------------------------------------------------------------------------------------------------------------------------------------------------------------|
| <b>General odor</b> | Olfactory sensation perceived through the olfactory organ (external via) when smelling the patty                                                                                      |
| <b>Meat odor</b>    | Olfactory sensation perceived using a raw meat patty as a reference                                                                                                                   |
| <b>Plant odor</b>   | Olfactory sensation perceived taking as reference a patty manufactured with cereals and legumes                                                                                       |
| <b>Color I</b>      | Visual sensation of hue, saturation and clarity induced by stimulation of the retina by light waves of various wavelengths (the reference being the brown color of cooked meat patty) |
| <b>Color II</b>     | Visual sensation of hue, saturation and clarity induced by stimulation of the retina by light waves of various wavelengths (the reference being the yellow color of soft nougat)      |
| <b>Appearance</b>   | Visual property of patty surface considering the ratio of meat/fat                                                                                                                    |
| <b>Flavor</b>       | The complex combination of olfactory, gustatory and trigeminal sensations perceived during the tasting (the reference being the conventional meat patty)                              |
| <b>Tenderness</b>   | Force needed to compress a cooked meat patty between the molars                                                                                                                       |
| <b>Juiciness</b>    | The sensation of moisture in the mouth when biting the cooked patty 5 times                                                                                                           |
| <b>Friability</b>   | The ease with which the cooked patty breaks into small fragments after chewing                                                                                                        |
| <b>Chewiness</b>    | Time required (in seconds) to grind a cooked patty in the mouth at a constant speed so that it reaches a suitable consistency for swallowing                                          |
| <b>Fatness</b>      | The fat sensation that occurs in the oral cavity after the removal of the cooked patty                                                                                                |
| <b>Aftertaste</b>   | Olfactory and/or gustatory sensations that occur after removal of the cooked patty and differ from the sensation perceived while the product was in the mouth                         |
